# Supplementary material for: Risk factors for malnutrition among school-aged children: a cross-sectional study in rural Madagascar
Source: Springer Nature journal article supplement (doi:10.1186/s12889-019-7013-9), 2019-06-17
Supplement: MOESM1 [file 16819890]

|                                  |                              |                                         |
|----------------------------------|------------------------------|-----------------------------------------|
| <b>Form A: HH/Com</b>            | Student unique number:<br>#★ |                                         |
| Community.....<br>Village: ..... | Date:.....(DD)/.....(MM)     | Team Code.....<br>Enumerator Code:..... |

### Preliminary Feasibility Study for Tafita Madagascar

**Questionnaire for:  
Children/Households in communities**

|                                                                                                                                                                                                                                                                                                                         |
|-------------------------------------------------------------------------------------------------------------------------------------------------------------------------------------------------------------------------------------------------------------------------------------------------------------------------|
| <b>Informed consent:</b>                                                                                                                                                                                                                                                                                                |
| Hi, my name is <b>XXXXXX</b> . I would like to request you to spend 30 min responding the questions about your child’s schooling and food consumption. If you could kindly collaborate with us, it would be much appreciated. Would you agree to be interviewed and do you allow us to make observations in your house? |
| <input type="checkbox"/> (1) Yes; <input type="checkbox"/> (2) No → Specify reason.....                                                                                                                                                                                                                                 |

| <b>PART 1: Students information</b> |                                                                   |                                                                                                                                                                                                                                                                                                                                                                                                                                                                                                                                                                                                                                                                                                                                                                                                                                                                                                                                                                                                                    |                     |            |   |          |   |                 |   |                    |   |                                  |   |                |   |                                  |   |          |
|-------------------------------------|-------------------------------------------------------------------|--------------------------------------------------------------------------------------------------------------------------------------------------------------------------------------------------------------------------------------------------------------------------------------------------------------------------------------------------------------------------------------------------------------------------------------------------------------------------------------------------------------------------------------------------------------------------------------------------------------------------------------------------------------------------------------------------------------------------------------------------------------------------------------------------------------------------------------------------------------------------------------------------------------------------------------------------------------------------------------------------------------------|---------------------|------------|---|----------|---|-----------------|---|--------------------|---|----------------------------------|---|----------------|---|----------------------------------|---|----------|
| Q1a ★                               | Name of the school                                                |                                                                                                                                                                                                                                                                                                                                                                                                                                                                                                                                                                                                                                                                                                                                                                                                                                                                                                                                                                                                                    |                     |            |   |          |   |                 |   |                    |   |                                  |   |                |   |                                  |   |          |
| Q1b ★                               | Name of the Fokontany                                             |                                                                                                                                                                                                                                                                                                                                                                                                                                                                                                                                                                                                                                                                                                                                                                                                                                                                                                                                                                                                                    |                     |            |   |          |   |                 |   |                    |   |                                  |   |                |   |                                  |   |          |
| Q1c ★                               | Name of the child                                                 | <table border="1" style="width: 100%; border-collapse: collapse;"> <tr> <td style="width: 50%; padding: 2px;">Family Name</td> <td style="width: 50%; padding: 2px;">Given Name</td> </tr> </table>                                                                                                                                                                                                                                                                                                                                                                                                                                                                                                                                                                                                                                                                                                                                                                                                                | Family Name         | Given Name |   |          |   |                 |   |                    |   |                                  |   |                |   |                                  |   |          |
| Family Name                         | Given Name                                                        |                                                                                                                                                                                                                                                                                                                                                                                                                                                                                                                                                                                                                                                                                                                                                                                                                                                                                                                                                                                                                    |                     |            |   |          |   |                 |   |                    |   |                                  |   |                |   |                                  |   |          |
| Q1d ★                               | Date of birth                                                     | .....(DD) / ..... (MM) / ..... (YY)                                                                                                                                                                                                                                                                                                                                                                                                                                                                                                                                                                                                                                                                                                                                                                                                                                                                                                                                                                                |                     |            |   |          |   |                 |   |                    |   |                                  |   |                |   |                                  |   |          |
| Q1e ★                               | Sex                                                               | <table border="1" style="width: 100%; border-collapse: collapse;"> <tr> <td style="width: 20%; text-align: center; padding: 2px;">1</td> <td style="padding: 2px;">Male</td> </tr> <tr> <td style="text-align: center; padding: 2px;">2</td> <td style="padding: 2px;">Female</td> </tr> </table>                                                                                                                                                                                                                                                                                                                                                                                                                                                                                                                                                                                                                                                                                                                  | 1                   | Male       | 2 | Female   |   |                 |   |                    |   |                                  |   |                |   |                                  |   |          |
| 1                                   | Male                                                              |                                                                                                                                                                                                                                                                                                                                                                                                                                                                                                                                                                                                                                                                                                                                                                                                                                                                                                                                                                                                                    |                     |            |   |          |   |                 |   |                    |   |                                  |   |                |   |                                  |   |          |
| 2                                   | Female                                                            |                                                                                                                                                                                                                                                                                                                                                                                                                                                                                                                                                                                                                                                                                                                                                                                                                                                                                                                                                                                                                    |                     |            |   |          |   |                 |   |                    |   |                                  |   |                |   |                                  |   |          |
| Q1f ▲                               | Number of school days since 6 November as of date of school visit | <div style="border: 1px solid black; width: 80px; height: 20px; display: inline-block;"></div> days                                                                                                                                                                                                                                                                                                                                                                                                                                                                                                                                                                                                                                                                                                                                                                                                                                                                                                                |                     |            |   |          |   |                 |   |                    |   |                                  |   |                |   |                                  |   |          |
| Q1g ▲                               | Number of absent days from school since 6 November 2017           | <div style="border: 1px solid black; width: 80px; height: 20px; display: inline-block;"></div> days                                                                                                                                                                                                                                                                                                                                                                                                                                                                                                                                                                                                                                                                                                                                                                                                                                                                                                                |                     |            |   |          |   |                 |   |                    |   |                                  |   |                |   |                                  |   |          |
| Q1h ▲                               | Score of recent <b>Math</b> test                                  | <table border="1" style="width: 100%; border-collapse: collapse;"> <tr> <th colspan="2" style="text-align: left; padding: 2px;"><b>Mathematics:</b></th> </tr> <tr> <td style="width: 20%; text-align: center; padding: 2px;">1</td> <td style="padding: 2px;">Beginner</td> </tr> <tr> <td style="text-align: center; padding: 2px;">2</td> <td style="padding: 2px;">Simple addition</td> </tr> <tr> <td style="text-align: center; padding: 2px;">3</td> <td style="padding: 2px;">Simple subtraction</td> </tr> <tr> <td style="text-align: center; padding: 2px;">4</td> <td style="padding: 2px;">2-digit addition and subtraction</td> </tr> <tr> <td style="text-align: center; padding: 2px;">5</td> <td style="padding: 2px;">multiplication</td> </tr> <tr> <td style="text-align: center; padding: 2px;">6</td> <td style="padding: 2px;">3-digit addition and subtraction</td> </tr> <tr> <td style="text-align: center; padding: 2px;">7</td> <td style="padding: 2px;">division</td> </tr> </table> | <b>Mathematics:</b> |            | 1 | Beginner | 2 | Simple addition | 3 | Simple subtraction | 4 | 2-digit addition and subtraction | 5 | multiplication | 6 | 3-digit addition and subtraction | 7 | division |
| <b>Mathematics:</b>                 |                                                                   |                                                                                                                                                                                                                                                                                                                                                                                                                                                                                                                                                                                                                                                                                                                                                                                                                                                                                                                                                                                                                    |                     |            |   |          |   |                 |   |                    |   |                                  |   |                |   |                                  |   |          |
| 1                                   | Beginner                                                          |                                                                                                                                                                                                                                                                                                                                                                                                                                                                                                                                                                                                                                                                                                                                                                                                                                                                                                                                                                                                                    |                     |            |   |          |   |                 |   |                    |   |                                  |   |                |   |                                  |   |          |
| 2                                   | Simple addition                                                   |                                                                                                                                                                                                                                                                                                                                                                                                                                                                                                                                                                                                                                                                                                                                                                                                                                                                                                                                                                                                                    |                     |            |   |          |   |                 |   |                    |   |                                  |   |                |   |                                  |   |          |
| 3                                   | Simple subtraction                                                |                                                                                                                                                                                                                                                                                                                                                                                                                                                                                                                                                                                                                                                                                                                                                                                                                                                                                                                                                                                                                    |                     |            |   |          |   |                 |   |                    |   |                                  |   |                |   |                                  |   |          |
| 4                                   | 2-digit addition and subtraction                                  |                                                                                                                                                                                                                                                                                                                                                                                                                                                                                                                                                                                                                                                                                                                                                                                                                                                                                                                                                                                                                    |                     |            |   |          |   |                 |   |                    |   |                                  |   |                |   |                                  |   |          |
| 5                                   | multiplication                                                    |                                                                                                                                                                                                                                                                                                                                                                                                                                                                                                                                                                                                                                                                                                                                                                                                                                                                                                                                                                                                                    |                     |            |   |          |   |                 |   |                    |   |                                  |   |                |   |                                  |   |          |
| 6                                   | 3-digit addition and subtraction                                  |                                                                                                                                                                                                                                                                                                                                                                                                                                                                                                                                                                                                                                                                                                                                                                                                                                                                                                                                                                                                                    |                     |            |   |          |   |                 |   |                    |   |                                  |   |                |   |                                  |   |          |
| 7                                   | division                                                          |                                                                                                                                                                                                                                                                                                                                                                                                                                                                                                                                                                                                                                                                                                                                                                                                                                                                                                                                                                                                                    |                     |            |   |          |   |                 |   |                    |   |                                  |   |                |   |                                  |   |          |

|                                                    |                                                                                                                                                                                                                                                                                                                                                                                                                                                                              |                                                                                                                                                                                       |                      |                      |                      |            |
|----------------------------------------------------|------------------------------------------------------------------------------------------------------------------------------------------------------------------------------------------------------------------------------------------------------------------------------------------------------------------------------------------------------------------------------------------------------------------------------------------------------------------------------|---------------------------------------------------------------------------------------------------------------------------------------------------------------------------------------|----------------------|----------------------|----------------------|------------|
| Q1i ▲                                              | Score of recent <b>Lecture</b> test                                                                                                                                                                                                                                                                                                                                                                                                                                          | <b>Lecture:</b>                                                                                                                                                                       |                      |                      |                      |            |
|                                                    |                                                                                                                                                                                                                                                                                                                                                                                                                                                                              | 1                                                                                                                                                                                     | Beginner             |                      |                      |            |
|                                                    |                                                                                                                                                                                                                                                                                                                                                                                                                                                                              | 2                                                                                                                                                                                     | Letter               |                      |                      |            |
|                                                    |                                                                                                                                                                                                                                                                                                                                                                                                                                                                              | 3                                                                                                                                                                                     | Word                 |                      |                      |            |
|                                                    |                                                                                                                                                                                                                                                                                                                                                                                                                                                                              | 4                                                                                                                                                                                     | Paragraph            |                      |                      |            |
|                                                    |                                                                                                                                                                                                                                                                                                                                                                                                                                                                              | 5                                                                                                                                                                                     | History              |                      |                      |            |
| Q1j ●                                              | Distance from home to the school                                                                                                                                                                                                                                                                                                                                                                                                                                             | 1                                                                                                                                                                                     | < 30 minute walk     |                      |                      |            |
|                                                    |                                                                                                                                                                                                                                                                                                                                                                                                                                                                              | 2                                                                                                                                                                                     | 30 -60 minute walk   |                      |                      |            |
|                                                    |                                                                                                                                                                                                                                                                                                                                                                                                                                                                              | 3                                                                                                                                                                                     | >60 minute walk      |                      |                      |            |
| Q1k ▲                                              | Height<br>→ Precise at the level of 0.1cm                                                                                                                                                                                                                                                                                                                                                                                                                                    | <input type="text"/>                                                                                                                                                                  | <input type="text"/> | <input type="text"/> | <input type="text"/> | (cm)       |
| Q1l ▲                                              | Weight<br>→ Precise at the level of 0.1kg                                                                                                                                                                                                                                                                                                                                                                                                                                    | <input type="text"/>                                                                                                                                                                  | <input type="text"/> | <input type="text"/> | <input type="text"/> | (kg)       |
| Q1m ●                                              | On any day of the last 14 days, did your child have loose <b>OR</b> liquid stool more than 3 times in 24 hr?                                                                                                                                                                                                                                                                                                                                                                 | 1                                                                                                                                                                                     | Yes                  |                      |                      |            |
|                                                    |                                                                                                                                                                                                                                                                                                                                                                                                                                                                              | 0                                                                                                                                                                                     | No                   |                      |                      |            |
| Q1n ▲                                              | When did your school conduct mass drug administration of iron tablets?                                                                                                                                                                                                                                                                                                                                                                                                       | .....(DD) / ..... (MM) / ..... (YY)                                                                                                                                                   |                      |                      |                      |            |
| Q1o ▲                                              | When did your school conduct mass drug administration of deworming tablets?                                                                                                                                                                                                                                                                                                                                                                                                  | .....(DD) / ..... (MM) / ..... (YY)                                                                                                                                                   |                      |                      |                      |            |
| <b>PART2: Household socio-economic information</b> |                                                                                                                                                                                                                                                                                                                                                                                                                                                                              |                                                                                                                                                                                       |                      |                      |                      |            |
| Q2a ●                                              | Name of the interviewee                                                                                                                                                                                                                                                                                                                                                                                                                                                      | Family name..... Given name.....                                                                                                                                                      |                      |                      |                      |            |
| Q2b ●                                              | Phone number                                                                                                                                                                                                                                                                                                                                                                                                                                                                 | Number: .....                                                                                                                                                                         |                      |                      |                      | 0 No phone |
| Q2c ●                                              | Relationship between child and Interviewee                                                                                                                                                                                                                                                                                                                                                                                                                                   | 1                                                                                                                                                                                     | Father               | 4                    | Grandmother          |            |
|                                                    |                                                                                                                                                                                                                                                                                                                                                                                                                                                                              | 2                                                                                                                                                                                     | Mother               | 5                    | Sister/Brother       |            |
|                                                    |                                                                                                                                                                                                                                                                                                                                                                                                                                                                              | 3                                                                                                                                                                                     | Grandfather          | 6                    | Other (Specify ..... |            |
| Q2d ●                                              | How many people are in the household?<br>→ Household is defined as a “Group of persons who live together <b>and</b> share income <b>and</b> food at least for 6 months”<br>→ Count all the family members one by one                                                                                                                                                                                                                                                         | ..... (person)                                                                                                                                                                        |                      |                      |                      |            |
| Q2e ●                                              | Major income sources<br>→ Fill the numbers in the right boxes.<br>1: Agriculture and sales of crops<br>2: Livestock and sales of animal<br>3: Fishing<br>4: Unskilled wage labor<br>5: Skilled labor<br>6: Handicrafts/artisanal work<br>7: Seller, commercial activities<br>8: Remittances from families<br>9: Salaries, wages (employee)<br>10: Begging, Assistance<br>11: Government allowance (pension, disability benefit)<br>12: Daily job<br>13: Other (Specify ..... | The greatest income source <input type="text"/><br><br>2 <sup>nd</sup> greatest income source <input type="text"/><br><br>3 <sup>rd</sup> greatest income source <input type="text"/> |                      |                      |                      |            |

|       |                                                                                                          |   |                                           |   |                       |
|-------|----------------------------------------------------------------------------------------------------------|---|-------------------------------------------|---|-----------------------|
| Q2f ● | Who are in charge of the greatest source of income                                                       | 1 | Father                                    | 4 | Grandmother           |
|       |                                                                                                          | 2 | Mother                                    | 5 | Other (Specify .....) |
|       |                                                                                                          | 3 | Grandfather                               |   |                       |
| Q2g ● | Do the family have their own land?<br>→Land for housing or farming or renting                            | 1 | YES                                       |   |                       |
|       |                                                                                                          | 0 | No                                        |   |                       |
| Q2h ● | Education level of a household member responsible for meal preparation<br><br>→Typically mother of child | 1 | Never go to any school                    |   |                       |
|       |                                                                                                          | 2 | Drop out in Primary school                |   |                       |
|       |                                                                                                          | 3 | Completed Primary school                  |   |                       |
|       |                                                                                                          | 4 | Completed Secondary school                |   |                       |
|       |                                                                                                          | 5 | Completed High school                     |   |                       |
|       |                                                                                                          | 6 | Completed University and higher education |   |                       |

**PART 3: Household Hygiene Information**

|       |                                                                              |                                                                                     |                                  |                                  |                                        |                                                                                      |
|-------|------------------------------------------------------------------------------|-------------------------------------------------------------------------------------|----------------------------------|----------------------------------|----------------------------------------|--------------------------------------------------------------------------------------|
| Q3a ☉ | Type of water source for drinking and cooking<br>→See examples in guidelines | <b>Improved water source</b>                                                        |                                  | <b>Not improved water source</b> |                                        |                                                                                      |
|       |                                                                              | 1                                                                                   | Piped household water connection | 6                                | Unprotected well                       |   |
|       |                                                                              |   |                                  |                                  |                                        |                                                                                      |
|       |                                                                              | 2                                                                                   | Public standpipe                 | 7                                | Unprotected spring                     |  |
|       |                                                                              |  |                                  |                                  |                                        |                                                                                      |
|       |                                                                              | 3                                                                                   | Protected well/borehole          | 8                                | Surface water (river, lake, reservoir) |  |
|       |                                                                              |  |                                  |                                  |                                        |                                                                                      |
|       |                                                                              | 4                                                                                   | Protected spring                 | 9                                | Vendor-provided water (cart, truck)    |  |
|       |                                                                              |  |                                  |                                  |                                        |                                                                                      |

|                                                                          |                                                                                                             |                                                                                                                 |                                                                                                                                                        |
|--------------------------------------------------------------------------|-------------------------------------------------------------------------------------------------------------|-----------------------------------------------------------------------------------------------------------------|--------------------------------------------------------------------------------------------------------------------------------------------------------|
|                                                                          |                                                                                                             | <p>5 Rainwater collection</p>  | <p>10 Bottled water</p>                                              |
| <p>Q3b</p>                                                               | <p>How long does it take to reach the water source?<br/>→Check the watch to estimate how long it takes.</p> | <p>..... (minute)</p>                                                                                           |                                                                                                                                                        |
| <p>Q3c</p>                                                               | <p>Type of toilet<br/><br/>→See examples in guidelines</p>                                                  | <p style="text-align: center;"><b>Improved toilet</b></p>                                                       | <p style="text-align: center;"><b>Not improved toilet</b></p>                                                                                          |
| <p>1 Flush connected to sewerage system</p>                              |                                                                                                             |                                | <p>6 Flush toilet not connected to sewerage/pit</p>                  |
| <p>2 Flush connected to a septic tank</p>                                |                                                                                                             |                              | <p>7 Latrines without slab / open pit</p>                           |
| <p>3 Toilet connected to a pit</p>                                       |                                                                                                             |                              | <p>8 Bucket</p>                                                    |
| <p>4 Improved ventilated latrine /<br/>Ventilated improved pit (VIP)</p> |                                                                                                             |                              | <p>9 Joint installation with other households (public toilet)</p>  |



|                                             |                                                                                                                                                                                                                                                                                                                                                                                                                                                                           |                                                                                                               |                                                                                                                                                 |     |            |  |                     |           |                                                 |                |  |
|---------------------------------------------|---------------------------------------------------------------------------------------------------------------------------------------------------------------------------------------------------------------------------------------------------------------------------------------------------------------------------------------------------------------------------------------------------------------------------------------------------------------------------|---------------------------------------------------------------------------------------------------------------|-------------------------------------------------------------------------------------------------------------------------------------------------|-----|------------|--|---------------------|-----------|-------------------------------------------------|----------------|--|
|                                             |                                                                                                                                                                                                                                                                                                                                                                                                                                                                           | <p>5 Latrines with slab</p> 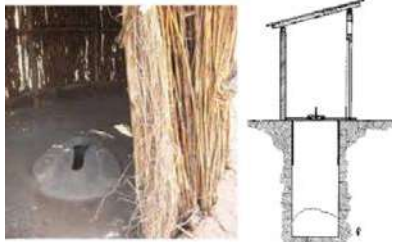 | <p>10 Outdoor defecation (field, forest, bush and river)</p>  |     |            |  |                     |           |                                                 |                |  |
| Q3d ●                                       | Number of minutes to be spent reaching the nearest health facility?                                                                                                                                                                                                                                                                                                                                                                                                       |                                                                                                               | ..... minutes                                                                                                                                   |     |            |  |                     |           |                                                 |                |  |
| Q3e ●                                       | Wash hands with soap/ash after toilet (to be asked household member responsible for cooking ) →Even though soap/ash is not found, no need to re-verify this answer                                                                                                                                                                                                                                                                                                        |                                                                                                               | 1                                                                                                                                               | Yes |            |  |                     |           |                                                 |                |  |
|                                             |                                                                                                                                                                                                                                                                                                                                                                                                                                                                           |                                                                                                               | 0                                                                                                                                               | No  |            |  |                     |           |                                                 |                |  |
| Q3f ●                                       | Wash hands with soap/ash before cooking (to be asked household member responsible for cooking ) →Even though soap/ash is not found, no need to re-verify this answer                                                                                                                                                                                                                                                                                                      |                                                                                                               | 1                                                                                                                                               | Yes |            |  |                     |           |                                                 |                |  |
|                                             |                                                                                                                                                                                                                                                                                                                                                                                                                                                                           |                                                                                                               | 0                                                                                                                                               | No  |            |  |                     |           |                                                 |                |  |
| Q3g ●                                       | Wash hands with soap/ash before eating (to be asked household member responsible for cooking ) →Even though soap/ash is not found, no need to re-verify this answer                                                                                                                                                                                                                                                                                                       |                                                                                                               | 1                                                                                                                                               | Yes |            |  |                     |           |                                                 |                |  |
|                                             |                                                                                                                                                                                                                                                                                                                                                                                                                                                                           |                                                                                                               | 0                                                                                                                                               | No  |            |  |                     |           |                                                 |                |  |
| Q3h ◎                                       | Presence and status of the soap<br>→ Direct observation                                                                                                                                                                                                                                                                                                                                                                                                                   | 1                                                                                                             | Yes, soap wet or seems to have been wet                                                                                                         |     |            |  |                     |           |                                                 |                |  |
|                                             |                                                                                                                                                                                                                                                                                                                                                                                                                                                                           | 2                                                                                                             | Yes, soap dried or cracked                                                                                                                      |     |            |  |                     |           |                                                 |                |  |
|                                             |                                                                                                                                                                                                                                                                                                                                                                                                                                                                           | 3                                                                                                             | Ash                                                                                                                                             |     |            |  |                     |           |                                                 |                |  |
|                                             |                                                                                                                                                                                                                                                                                                                                                                                                                                                                           | 4                                                                                                             | Neither soap nor ash                                                                                                                            |     |            |  |                     |           |                                                 |                |  |
| Q3i ◎                                       | Rice storage<br>→ Direct observation                                                                                                                                                                                                                                                                                                                                                                                                                                      | 1                                                                                                             | Plastic or metal container with cover                                                                                                           |     |            |  |                     |           |                                                 |                |  |
|                                             |                                                                                                                                                                                                                                                                                                                                                                                                                                                                           | 2                                                                                                             | Plastic or metal container without cover                                                                                                        |     |            |  |                     |           |                                                 |                |  |
|                                             |                                                                                                                                                                                                                                                                                                                                                                                                                                                                           | 3                                                                                                             | 50 Kg Rice bag                                                                                                                                  |     |            |  |                     |           |                                                 |                |  |
| Q3j ◎                                       | Utensils for eating maintenance (e.g. Spoons, Plates, Soup Bowls)<br>→ Direct observation                                                                                                                                                                                                                                                                                                                                                                                 | 1                                                                                                             | Storing them in cabinet after cleaning                                                                                                          |     |            |  |                     |           |                                                 |                |  |
|                                             |                                                                                                                                                                                                                                                                                                                                                                                                                                                                           | 2                                                                                                             | Storing them in open-space after cleaning                                                                                                       |     |            |  |                     |           |                                                 |                |  |
|                                             |                                                                                                                                                                                                                                                                                                                                                                                                                                                                           | 3                                                                                                             | Storing them not in cabinet but covered                                                                                                         |     |            |  |                     |           |                                                 |                |  |
|                                             |                                                                                                                                                                                                                                                                                                                                                                                                                                                                           | 4                                                                                                             | Leaving them open-space without cleaning                                                                                                        |     |            |  |                     |           |                                                 |                |  |
| <b>PART 4: Food Consumption Information</b> |                                                                                                                                                                                                                                                                                                                                                                                                                                                                           |                                                                                                               |                                                                                                                                                 |     |            |  |                     |           |                                                 |                |  |
| Q4a ▲                                       | Was there school feeding at school yesterday?                                                                                                                                                                                                                                                                                                                                                                                                                             | 1                                                                                                             | Yes, breakfast                                                                                                                                  | 2   | Yes, lunch |  |                     |           |                                                 |                |  |
|                                             |                                                                                                                                                                                                                                                                                                                                                                                                                                                                           |                                                                                                               |                                                                                                                                                 | 3   | No         |  |                     |           |                                                 |                |  |
| Q4b ▲                                       | <p>If yes, what was the menu?</p> <table border="1" data-bbox="252 1610 1342 1998"> <tr> <td data-bbox="252 1610 563 1644"></td> <td data-bbox="563 1610 1342 1644"><b>School meals</b></td> </tr> <tr> <td data-bbox="252 1644 563 1709">[Example]</td> <td data-bbox="563 1644 1342 1709">Rice and accompaniment (beans, green leaves...)</td> </tr> <tr> <td data-bbox="252 1709 563 1998">[To be filled]</td> <td data-bbox="563 1709 1342 1998"></td> </tr> </table> |                                                                                                               |                                                                                                                                                 |     |            |  | <b>School meals</b> | [Example] | Rice and accompaniment (beans, green leaves...) | [To be filled] |  |
|                                             | <b>School meals</b>                                                                                                                                                                                                                                                                                                                                                                                                                                                       |                                                                                                               |                                                                                                                                                 |     |            |  |                     |           |                                                 |                |  |
| [Example]                                   | Rice and accompaniment (beans, green leaves...)                                                                                                                                                                                                                                                                                                                                                                                                                           |                                                                                                               |                                                                                                                                                 |     |            |  |                     |           |                                                 |                |  |
| [To be filled]                              |                                                                                                                                                                                                                                                                                                                                                                                                                                                                           |                                                                                                               |                                                                                                                                                 |     |            |  |                     |           |                                                 |                |  |

|       |                                                                                                                                                                                                                                                |                                                                |               |                                                               |               |                                                                    |                         |
|-------|------------------------------------------------------------------------------------------------------------------------------------------------------------------------------------------------------------------------------------------------|----------------------------------------------------------------|---------------|---------------------------------------------------------------|---------------|--------------------------------------------------------------------|-------------------------|
| Q4c ● | Meals taken yesterday from waking up to going to bed (circle all applied)                                                                                                                                                                      | 1                                                              | Breakfast     |                                                               |               |                                                                    |                         |
|       |                                                                                                                                                                                                                                                | 2                                                              | Lunch         |                                                               |               |                                                                    |                         |
|       |                                                                                                                                                                                                                                                | 3                                                              | Dinner/Supper |                                                               |               |                                                                    |                         |
| Q4d ● | <p>Diet diversity for 24hr of the previous day (i.e. yesterday)<br/>         → To be completed during the interview<br/>         → If target T1/T2 student is present, ask what food he/she ate for snack, which often parents don't know.</p> |                                                                |               |                                                               |               |                                                                    |                         |
|       | <b>Breakfast</b>                                                                                                                                                                                                                               | <b>Snack</b>                                                   | <b>Lunch</b>  | <b>Snack</b>                                                  | <b>Dinner</b> | <b>Snack</b>                                                       |                         |
|       | <b>[Example]</b>                                                                                                                                                                                                                               | Tea,<br>Millet porridge<br>[ground millet;<br>water;<br>sugar] | Ground nuts   | Rice,<br>Sauce with greens<br>[cassava leaves;<br>onion; oil] | Mango         | Rice,<br>Pumpkin sauce<br>[pumpkin;<br>oil; dried fish;<br>tomato] | Coffee<br>[sugar, milk] |
|       |                                                                                                                                                                                                                                                |                                                                |               |                                                               |               |                                                                    |                         |
|       | <p>→ This information will be converted into Q4e – Q4t. Therefore, it is not necessary to enter the above data into computer.</p>                                                                                                              |                                                                |               |                                                               |               |                                                                    |                         |

| Food diversity |                                                                                                                                                                                                                                                            |   |     |   |    |
|----------------|------------------------------------------------------------------------------------------------------------------------------------------------------------------------------------------------------------------------------------------------------------|---|-----|---|----|
| Q4e★           | [#1] <b>Cereal:</b> Corn/maize, rice, wheat, sorghum, millet or any other grains or foods made from these (e.g. bread, noodles, porridge or grain products) + insert local foods e.g. ugali, nshima, porridge or pastes or other locally available grains. | 1 | YES | 0 | NO |
| Q4f★           | [#2] <b>Vitamin A rich vegetables &amp; tubers:</b> Pumpkin, carrots, squash, sweet potatoes that are orange inside + other locally available vitamin A rich vegetables (e.g. red sweet pepper)                                                            | 1 | YES | 0 | NO |
| Q4g★           | [#3] <b>White roots &amp; tubers:</b> White potatoes, white yams, white cassava, or other foods made from roots                                                                                                                                            | 1 | YES | 0 | NO |
| Q4h★           | [#4] <b>Dark green leafy vegetables:</b> Dark green/leafy vegetables, including wild ones + locally available vitamin A rich leaves such as amaranth, cassava leaves, kale, spinach, etc.                                                                  | 1 | YES | 0 | NO |
| Q4i★           | [#5] <b>Other vegetables:</b> Other vegetables (e.g. tomato, onion, eggplant) including wild vegetables                                                                                                                                                    | 1 | YES | 0 | NO |
| Q4j★           | [#6] <b>Vitamin A rich fruits:</b> Ripe mangoes, cantaloupe, apricots (fresh or dried), ripe papaya, dried peaches + other locally available vitamin A rich fruits                                                                                         | 1 | YES | 0 | NO |
| Q4k★           | [#7] <b>Other fruits:</b> Other fruits, including wild fruits                                                                                                                                                                                              | 1 | YES | 0 | NO |
| Q4l★           | [#8] <b>Organ meats:</b> Liver, kidney, heart, or other organ meats or blood -based foods                                                                                                                                                                  | 1 | YES | 0 | NO |
| Q4m★           | [#9] <b>Flesh meats:</b> Beef, pork, lamb, goat, rabbit, wild game, chicken, duck, or other birds                                                                                                                                                          | 1 | YES | 0 | NO |
| Q4n★           | [#10] <b>Eggs:</b> Chicken, duck, guinea fowl, or any other egg                                                                                                                                                                                            | 1 | YES | 0 | NO |
| Q4o★           | [#11] <b>Fish:</b> Fresh or dried fish or shellfish                                                                                                                                                                                                        | 1 | YES | 0 | NO |
| Q4p★           | [#12] <b>Legumes, nuts &amp; seeds:</b> Beans, peas, lentils, nuts, seeds or foods made from them                                                                                                                                                          | 1 | YES | 0 | NO |
| Q4q★           | [#13] <b>Milk &amp; milk products:</b> Milk, cheese, yogurt, or other milk products                                                                                                                                                                        | 1 | YES | 0 | NO |
| Q4r★           | [#14] <b>Oils &amp; fats:</b> Oil, fats or butter added to food or used for cooking                                                                                                                                                                        | 1 | YES | 0 | NO |
| Q4s★           | [#15] <b>Sweets:</b> Sugar, honey, sweetened soda, sweetened juice or sugary foods such as chocolates, candies, cookies and cakes                                                                                                                          | 1 | YES | 0 | NO |
| Q4t★           | [#16] <b>Spices condiments &amp; beverages:</b> Spices (black pepper, salt), condiments (soy sauce, hot sauce), coffee, tea, alcoholic beverages, or local examples                                                                                        | 1 | YES | 0 | NO |

|      |                                                                                                                                                                                                   |   |                                                                                                                                    |
|------|---------------------------------------------------------------------------------------------------------------------------------------------------------------------------------------------------|---|------------------------------------------------------------------------------------------------------------------------------------|
| Q4u★ | Regarding the diet diversity of the previous 4 days;<br>Is what you ate yesterday similar to what you have eaten for 3days before yesterday (4 days ago, 3days ago and the day before yesterday)? | 1 | <b>YES,</b><br>What I ate yesterday is something similar to what I have eaten 4 days ago, 3 days ago and the day before yesterday. |
|      |                                                                                                                                                                                                   | 0 | <b>NO,</b><br>What I ate yesterday is very different from what I have eaten 4 days ago, 3 days ago and the day before yesterday.   |

**LEGEND**

- ★ Data to be transcribed from students' registry at the time of sampling
- ▲ Data to be calculated and entered by enumerators after school/household visit
- ▲ Data to be either transcribed or measured at the time of anthropometric measurement
- Data to be collected from interview at households
- ◎ Data to be collected from observation at households

**END**
